# Supplementary material for: The Association between Genomic DNA Methylation and Diabetic Peripheral Neuropathy in Patients with Type 2 Diabetes Mellitus
Source: Hindawi journal article supplement (doi:10.1155/2019/2494057), 2019-11-03
Supplement: f1 [file 2494057.f1.pdf]

| The specific conditions of HPLC |                                                         |         |        |                    |     |     |     |
|---------------------------------|---------------------------------------------------------|---------|--------|--------------------|-----|-----|-----|
| Chromatographic column          | XTerra® RP18 (4.6×150 mm, 3.5 μm)                       |         |        |                    |     |     |     |
| Pre-column                      | Phenomenex Security Guard™ C <sub>18</sub> (4 × 3.0 mm) |         |        |                    |     |     |     |
| TEM of column                   | 30℃                                                     |         |        |                    |     |     |     |
|                                 | A: Water    B: Methanol                                 |         |        |                    |     |     |     |
|                                 | Time                                                    | A%      | B%     | Flow rate (mL/min) |     |     |     |
| Mobile phase                    | 0                                                       | 97      | 3      | 0.5                |     |     |     |
|                                 | 5                                                       | 97      | 3      | 0.5                |     |     |     |
|                                 | 6                                                       | 0       | 100    | 0.5                |     |     |     |
|                                 | 7.5                                                     | 0       | 100    | 0.5                |     |     |     |
|                                 | 8                                                       | 97      | 3      | 0.5                |     |     |     |
|                                 | 15                                                      | 97      | 3      | 0.5                |     |     |     |
| Running time                    | 15 min                                                  |         |        |                    |     |     |     |
| Sampling volume                 | 10 μL                                                   |         |        |                    |     |     |     |
| TEM of autosampler              | 4℃                                                      |         |        |                    |     |     |     |
| The specific conditions of MS   |                                                         |         |        |                    |     |     |     |
| Ion source                      | ESI                                                     |         |        |                    |     |     |     |
| Ionic polarity                  | Positive                                                |         |        |                    |     |     |     |
| Scan patterns                   | MRM                                                     |         |        |                    |     |     |     |
|                                 | Precursor                                               | Product | Dwell  | DP                 | EP  | CE  | CXP |
| Ion                             | Ion                                                     | Ion     | Time   |                    |     |     |     |
|                                 | (Da)                                                    | (Da)    | (msec) | (V)                | (V) | (V) | (V) |
| dC                              | 228.2                                                   | 112.1   | 200    | 40                 | 10  | 15  | 10  |
| 5-mdC                           | 242.2                                                   | 126.1   | 200    | 40                 | 10  | 22  | 10  |
| cyt                             | 112.1                                                   | 95.1    | 200    | 114                | 10  | 20  | 10  |
| 5mcyt                           | 126.1                                                   | 109.1   | 200    | 114                | 10  | 20  | 10  |
| dG                              | 268.2                                                   | 152.1   | 200    | 40                 | 10  | 22  | 10  |
| CAD                             | 8 psi                                                   |         |        |                    |     |     |     |
| CUR                             | 30 psi                                                  |         |        |                    |     |     |     |
| GS1                             | 50 psi                                                  |         |        |                    |     |     |     |
| GS2                             | 50 psi                                                  |         |        |                    |     |     |     |
| IS                              | 3500 V                                                  |         |        |                    |     |     |     |
| TEM                             | 550℃                                                    |         |        |                    |     |     |     |

**Supplementary Table 1. The specific conditions for LC-MS/MS analysis.**

ESI: electron spray ionization. MRM: multiple reaction monitoring. DP: declustering potential. EP: entrance potential. CE: collision energy. CXP: collision cell exit potential. CAD: collision gas CUR: curtain gas. GS1: gas 1. GS2: gas 2. IS: ion spray voltage. TEM: temperature.

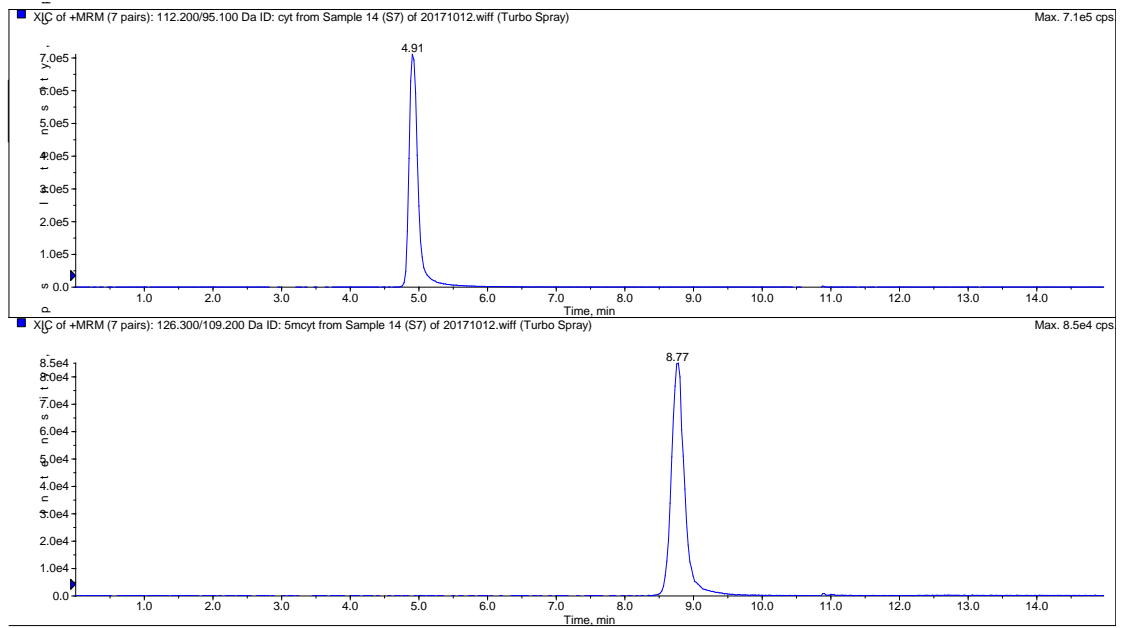

**Supplementary Figure 1. The typical chromatographic peaks.**

The typical chromatogram of solution spiked with cyt and 5mcyt.
